# Supplementary material
Source: PubMed Central journal article supplement (PMC1690633)

This is an appendix to the paper by Nagl *et al.* 2000 The origin and age of haplochromine fishes in Lake Victoria, East Africa. *Proc. R. Soc. Lond. B* **267**, 1049–1061.

Electronic appendices are refereed with the paper. However, no attempt has been made to impose a uniform editorial style on the electronic appendices.

## APPENDIX A

| Sequence        | 1                                                                                                                       | 120           | Haplogroup | Locality |
|-----------------|-------------------------------------------------------------------------------------------------------------------------|---------------|------------|----------|
| 1514            | CCGGGCTCTGCCTTCGATGCAAACGTTATGCATATATGTATTATCACCATTATTTTATGTAAACATATCCTATATATTAATACATCTCATTTAACAGAA*TATAGGTAGATATACCACA |               | VA         | 17       |
| 1605            | -----T-----                                                                                                             | -----C-----A  |            | 16       |
| 9019            | -----                                                                                                                   | -----A-C----- | VB         | 45       |
| 8880            | -----                                                                                                                   | -----A-C----- |            | 39       |
| 8722            | -----                                                                                                                   | -----A-C----- |            | 40       |
| 8773            | -----A-----                                                                                                             | -----A-C----- |            | 39       |
| 8777            | -----                                                                                                                   | -----A-C----- |            | 39       |
| 8881            | -----                                                                                                                   | -----A-C----- |            | 39       |
| 8834            | -----                                                                                                                   | -----A-C----- |            | 44       |
| 8768            | -----                                                                                                                   | -----A-C----- |            | 39       |
| 8786            | -----                                                                                                                   | -----A-C----- |            | 44       |
| 8837            | -----                                                                                                                   | -----A-C----- |            | 44       |
| 8778            | -----                                                                                                                   | -----A-C----- |            | 39       |
| 8711            | -----                                                                                                                   | -----A-C----- |            | 40       |
| 8718            | -----                                                                                                                   | -----A-C----- |            | 40       |
| 8833            | -----                                                                                                                   | -----A-C----- |            | 44       |
| 8831            | -----                                                                                                                   | -----A-C----- |            | 44       |
| 8879            | -----                                                                                                                   | -----A-C----- |            | 39       |
| 8741            | -----                                                                                                                   | -----G-C----- |            | 40       |
| 9049            | -----                                                                                                                   | -----A-C----- |            | 46       |
| 8801            | -----                                                                                                                   | -----A-C----- |            | 44       |
| 8990            | -----                                                                                                                   | -----A-C----- | 45         |          |
| 8924            | -----                                                                                                                   | -----A-C----- | 43         |          |
| 9003            | -----                                                                                                                   | -----A-C----- | 45         |          |
| 8687            | -----                                                                                                                   | -----A-C----- | 41         |          |
| 8692            | -----                                                                                                                   | -----A-C----- | 41         |          |
| 8694            | -----                                                                                                                   | -----A-C----- | 41         |          |
| 8948            | -----                                                                                                                   | -----A-C----- | 42         |          |
| 8947            | -----A-----                                                                                                             | -----A-C----- | 42         |          |
| 8950            | -----                                                                                                                   | -----A-C----- | 42         |          |
| <i>Enci</i>     | -----                                                                                                                   | -----A-C----- | VC         | 48       |
| <i>Asve616</i>  | -----                                                                                                                   | -----A-C----- |            | 36       |
| <i>Prve687</i>  | -----                                                                                                                   | -----A-C----- |            | 36       |
| <i>Prve691</i>  | -----                                                                                                                   | -----A-C----- |            | 36       |
| <i>Pach5722</i> | -----                                                                                                                   | -----A-C----- |            | 54       |
| <i>Pap1160</i>  | -----                                                                                                                   | -----A-C----- |            | 47       |





Sequence 121

240 Haplogroup

Localit

| <u>Y</u>        |          |                                                                                                                    |   |       |       |       |       |       |       |
|-----------------|----------|--------------------------------------------------------------------------------------------------------------------|---|-------|-------|-------|-------|-------|-------|
| 1514            | TATTTGTT | AACAACATTTTAACTAAGGGGTACATAAACCA*TAATTGAGTACTCTCCAATAAATATTTATTAATTACTGAACGATAGTTTAAAGACCGATCACAACCTCTCAC*TGGTTAAG |   |       |       |       |       |       |       |
| 1605            | -----    | -----                                                                                                              | C | ----- | ----- | ----- | ----- | ----- | ----- |
| 9019            | -----    | C-----                                                                                                             | C | ----- | ----- | ----- | ----- | ----- | ----- |
| 8880            | -----    | C-----G-----                                                                                                       | C | C     | ----- | G     | ----- | ----- | ----- |
| 8722            | -----    | C-----                                                                                                             | C | A     | ----- | ----- | ----- | ----- | ----- |
| 8773            | -----    | C-----                                                                                                             | C | ----- | ----- | ----- | ----- | A     | ----- |
| 8777            | -----    | C-----                                                                                                             | C | ----- | ----- | ----- | ----- | A     | ----- |
| 8881            | -----    | C-----                                                                                                             | C | ----- | ----- | ----- | ----- | ----- | ----- |
| 8834            | -----    | C-----                                                                                                             | C | ----- | C     | ----- | ----- | ----- | ----- |
| 8768            | -----    | C-----                                                                                                             | C | ----- | ----- | ----- | ----- | C     | ----- |
| 8786            | -----    | C-----                                                                                                             | C | A     | ----- | ----- | ----- | C     | ----- |
| 8837            | -----    | C-----                                                                                                             | C | C     | ----- | ----- | ----- | C     | ----- |
| 8778            | -----    | C-----                                                                                                             | C | C     | ----- | ----- | ----- | C     | ----- |
| 8711            | -----    | C-----                                                                                                             | C | T     | ----- | ----- | ----- | C     | ----- |
| 8718            | -----    | C-----                                                                                                             | C | C     | ----- | ----- | ----- | CC    | ----- |
| 8833            | -----    | C-----                                                                                                             | C | A     | ----- | ----- | ----- | ----- | ----- |
| 8831            | -----    | C-----                                                                                                             | C | A     | ----- | ----- | ----- | ----- | ----- |
| 8879            | -----    | C-----                                                                                                             | C | A     | ----- | ----- | ----- | ----- | ----- |
| 8741            | -----    | C-----                                                                                                             | C | A     | ----- | ----- | ----- | ----- | ----- |
| 9049            | -----    | C-----                                                                                                             | C | C     | A     | ----- | ----- | ----- | ----- |
| 8801            | -----    | C-----                                                                                                             | C | A     | ----- | C     | ----- | ----- | ----- |
| 8990            | -----    | C-----                                                                                                             | C | C     | ----- | ----- | ----- | ----- | ----- |
| 8924            | -----    | C-----                                                                                                             | C | ----- | ----- | ----- | ----- | ----- | ----- |
| 9003            | -----    | C-----                                                                                                             | C | C     | ----- | ----- | ----- | ----- | ----- |
| 8687            | -----    | C-----                                                                                                             | C | ----- | ----- | ----- | ----- | ----- | ----- |
| 8692            | -----    | C-----                                                                                                             | C | ----- | ----- | ----- | ----- | C     | ----- |
| 8694            | -----    | C-----                                                                                                             | C | T     | ----- | ----- | ----- | ----- | ----- |
| 8948            | -----    | C-----                                                                                                             | C | A     | ----- | ----- | ----- | ----- | ----- |
| 8947            | -----    | C-----                                                                                                             | C | T     | ----- | ----- | ----- | ----- | ----- |
| 8950            | -----    | C-----                                                                                                             | C | ----- | ----- | ----- | ----- | C     | ----- |
| <i>Enci</i>     | -----    | C-----                                                                                                             | C | ----- | ----- | ----- | ----- | ----- | ----- |
| <i>Asve616</i>  | -----    | C-----                                                                                                             | C | ----- | ----- | A     | ----- | ----- | ----- |
| <i>Prve687</i>  | -----    | C-----                                                                                                             | C | ----- | ----- | ----- | ----- | ----- | ----- |
| <i>Prve691</i>  | -----    | C-----                                                                                                             | C | ----- | ----- | ----- | ----- | ----- | ----- |
| <i>Pach5722</i> | -----    | C-----                                                                                                             | C | A     | ----- | ----- | ----- | ----- | ----- |
| <i>Pap1160</i>  | -----    | C-----                                                                                                             | C | A     | ----- | ----- | ----- | C     | ----- |
| <i>Pach</i>     | -----    | C-----                                                                                                             | C | ----- | ----- | ----- | ----- | ----- | ----- |
| <i>Ptxe350</i>  | -----    | C-----                                                                                                             | C | C     | G     | ----- | ----- | C     | ----- |
| <i>Ptxe6864</i> | -----    | C-----                                                                                                             | C | ----- | ----- | ----- | ----- | C     | ----- |
| 8678            | -----    | C-----                                                                                                             | C | C     | ----- | ----- | ----- | ----- | ----- |
| 8632            | -----    | C-----                                                                                                             | C | ----- | ----- | ----- | ----- | ----- | ----- |
| 8680            | -----    | C-----                                                                                                             | C | ----- | ----- | ----- | ----- | ----- | ----- |
| <i>Asnu586</i>  | -----    | C-----                                                                                                             | C | C     | ----- | ----- | ----- | ----- | ----- |
| <i>Haro486</i>  | -----    | C-----                                                                                                             | C | A     | ----- | ----- | ----- | ----- | ----- |
| <i>Enni</i>     | -----    | C-----                                                                                                             | C | ----- | ----- | ----- | ----- | ----- | ----- |
| <i>Enni309</i>  | -----    | C-----                                                                                                             | C | ----- | ----- | ----- | ----- | ----- | ----- |
| <i>Ptsa</i>     | -----    | C-----                                                                                                             | C | ----- | ----- | ----- | ----- | ----- | ----- |
| <i>Asnu</i>     | -----    | C-----                                                                                                             | C | ----- | ----- | ----- | ----- | ----- | ----- |

VA

17

16

VB

45

39

40

39

39

39

44

39

44

44

39

40

40

44

44

39

40

40

46

44

45

43

45

41

41

41

42

42

42

VC

48

36

36

36

54

47

53

48

54

38

37

38

36

51

50

51

48

36





| Sequence        | 241                                                                                                                     | 360 | Haplogroup | Localit |
|-----------------|-------------------------------------------------------------------------------------------------------------------------|-----|------------|---------|
| <u>Y</u>        |                                                                                                                         |     |            |         |
| 1514            | ATATACCAAGTACCCACCATC*CTATT*TATACCCCTTATTTAATGTAGTAAGAGCCCACCATCAGTTGATTCTTAATGTTAACGGTTCTTGAAGGTCAAGGACAAATATTCGTGGGGG |     | <b>VA</b>  | 17      |
| 1605            | -----T-----C-----A---                                                                                                   |     |            | 16      |
| 9019            | -----TT-----                                                                                                            |     | <b>VB</b>  | 45      |
| 8880            | -----T-----                                                                                                             |     |            | 39      |
| 8722            | -----T-----                                                                                                             |     |            | 40      |
| 8773            | -----                                                                                                                   |     |            | 39      |
| 8777            | -----                                                                                                                   |     |            | 39      |
| 8881            | -----T-----                                                                                                             |     |            | 39      |
| 8834            | -----T-----                                                                                                             |     |            | 44      |
| 8768            | -----T-----                                                                                                             |     |            | 39      |
| 8786            | -----T-----                                                                                                             |     |            | 44      |
| 8837            | -----T-----                                                                                                             |     |            | 44      |
| 8778            | -----T-----                                                                                                             |     |            | 39      |
| 8711            | -----T-----                                                                                                             |     |            | 40      |
| 8718            | -----T-----                                                                                                             |     |            | 40      |
| 8833            | -----T-----                                                                                                             |     |            | 44      |
| 8831            | -----T-----A                                                                                                            |     |            | 44      |
| 8879            | -----T-----A                                                                                                            |     |            | 39      |
| 8741            | -----T-----A                                                                                                            |     |            | 40      |
| 9049            | -----T-----                                                                                                             |     |            | 46      |
| 8801            | -----T-----                                                                                                             |     |            | 44      |
| 8990            | -----T-----                                                                                                             |     |            | 45      |
| 8924            | -----A-----T-----                                                                                                       |     |            | 43      |
| 9003            | -----A-----T-----T-----                                                                                                 |     |            | 45      |
| 8687            | -----T-----                                                                                                             |     |            | 41      |
| 8692            | -----T-----                                                                                                             |     |            | 41      |
| 8694            | -----T-----                                                                                                             |     |            | 41      |
| 8948            | -----T-----                                                                                                             |     |            | 42      |
| 8947            | -----T-----                                                                                                             |     |            | 42      |
| 8950            | -----T-----                                                                                                             |     |            | 42      |
| <i>Enci</i>     | -----C-----T-----                                                                                                       |     | <b>VC</b>  | 48      |
| <i>Asve616</i>  | -----C-----T-----                                                                                                       |     |            | 36      |
| <i>Prve687</i>  | -----C-----T-----                                                                                                       |     |            | 36      |
| <i>Prve691</i>  | -----A-----C-----T-----                                                                                                 |     |            | 36      |
| <i>Pach5722</i> | -----C-----T-----                                                                                                       |     |            | 54      |
| <i>Pap1160</i>  | -----C-----T-----                                                                                                       |     |            | 47      |
| <i>Pach</i>     | -----CCT-----                                                                                                           |     |            | 53      |
| <i>Ptxe350</i>  | -----CCT-----                                                                                                           |     |            | 48      |
| <i>Ptxe6864</i> | -----CCT-----                                                                                                           |     |            | 54      |
| 8678            | -----CCT-----                                                                                                           |     |            | 38      |
| 8632            | -----A-----CCT-----                                                                                                     |     |            | 37      |
| 8680            | -----A-----CCT-----                                                                                                     |     |            | 38      |
| <i>Asnu586</i>  | -----CCT-----                                                                                                           |     |            | 36      |
| <i>Haro486</i>  | -----CCT-----                                                                                                           |     |            | 51      |
| <i>Enni</i>     | -----CCT-----                                                                                                           |     |            | 50      |
| <i>Enni309</i>  | -----AT-----CCT-----G-----                                                                                              |     |            | 51      |
| <i>Ptsa</i>     | -----CCT-----                                                                                                           |     |            | 48      |
| <i>Asnu</i>     | -----CCT-----                                                                                                           |     |            | 36      |





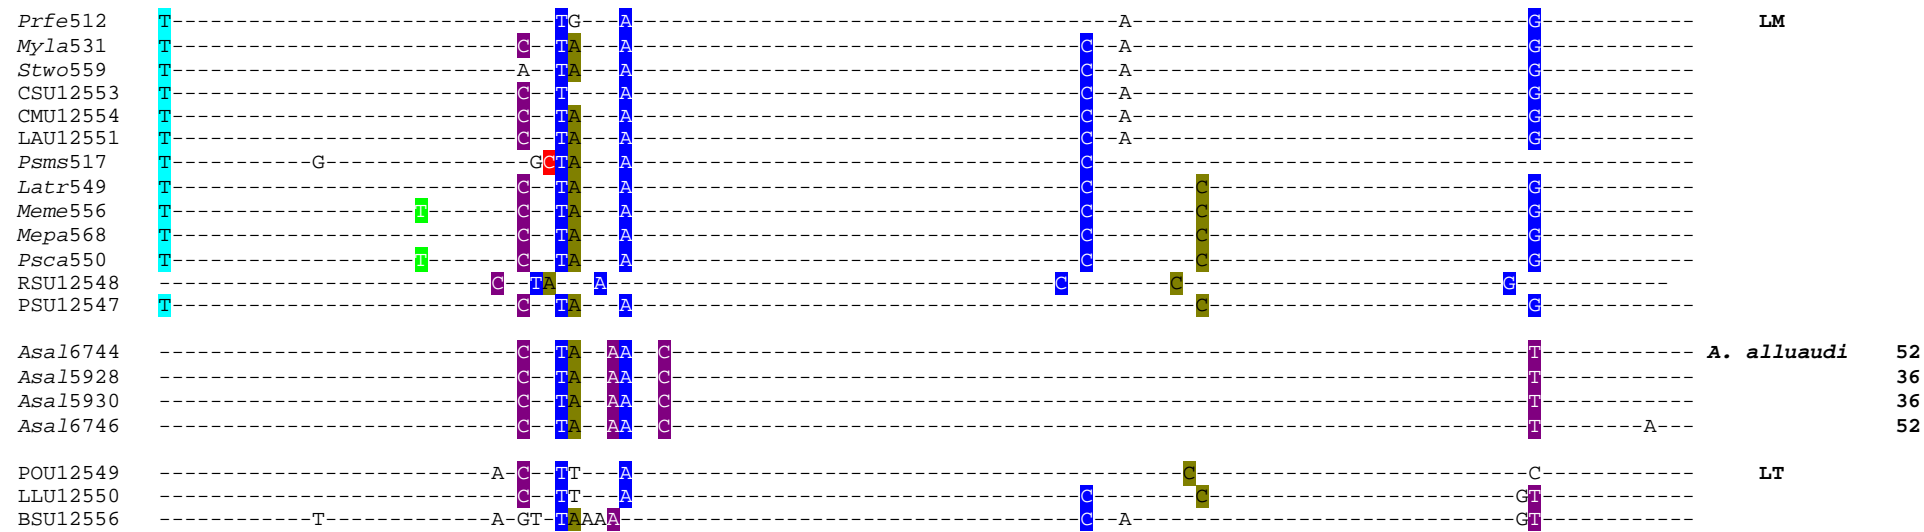

| <u>Sequence</u> | 361                                                                                                                     | 480 | <u>Haplogroup</u> | <u>Localit</u> |
|-----------------|-------------------------------------------------------------------------------------------------------------------------|-----|-------------------|----------------|
| <u>Y</u>        |                                                                                                                         |     |                   |                |
| 1514            | TTTCACTTAGTGAACTATTCTGGCATCTGGTTCCTATTTTCAGGTCCAATAATTGTTATAATTCCCATACTTTCATCGACGCTTGCATAAGTTAATGGTGGTAATACATACTCCTCGTT |     | <b>VA</b>         | 17             |
| 1605            | -----                                                                                                                   |     |                   | 16             |
| 9019            | -----                                                                                                                   | T   | <b>VB</b>         | 45             |
| 8880            | -----                                                                                                                   |     |                   | 39             |
| 8722            | -----                                                                                                                   |     |                   | 40             |
| 8773            | -----                                                                                                                   |     |                   | 39             |
| 8777            | -----                                                                                                                   |     |                   | 39             |
| 8881            | -----                                                                                                                   |     |                   | 39             |
| 8834            | -----                                                                                                                   |     |                   | 44             |
| 8768            | -----                                                                                                                   |     |                   | 39             |
| 8786            | -----                                                                                                                   |     |                   | 44             |
| 8837            | -----                                                                                                                   |     |                   | 44             |
| 8778            | -----                                                                                                                   |     |                   | 39             |
| 8711            | -----                                                                                                                   |     |                   | 40             |
| 8718            | -----                                                                                                                   |     |                   | 40             |
| 8833            | -----                                                                                                                   |     |                   | 44             |
| 8831            | -----                                                                                                                   |     |                   | 44             |
| 8879            | -----                                                                                                                   | G   |                   | 39             |
| 8741            | -----                                                                                                                   |     |                   | 40             |
| 9049            | -----                                                                                                                   |     |                   | 46             |
| 8801            | -----                                                                                                                   | T   |                   | 44             |
| 8990            | -----                                                                                                                   | T   |                   | 45             |
| 8924            | -----                                                                                                                   |     |                   | 43             |
| 9003            | -----                                                                                                                   |     |                   | 45             |
| 8687            | -----                                                                                                                   | T   |                   | 41             |
| 8692            | -----                                                                                                                   | T   |                   | 41             |
| 8694            | -----                                                                                                                   | T   |                   | 41             |
| 8948            | -----                                                                                                                   |     |                   | 42             |
| 8947            | -----                                                                                                                   |     |                   | 42             |
| 8950            | -----                                                                                                                   |     |                   | 42             |
| <i>Enci</i>     | -----                                                                                                                   |     | <b>VC</b>         | 48             |
| <i>Asve616</i>  | -----                                                                                                                   |     |                   | 36             |
| <i>Prve687</i>  | -----                                                                                                                   |     |                   | 36             |
| <i>Prve691</i>  | -----                                                                                                                   |     |                   | 36             |
| <i>Pach5722</i> | -----                                                                                                                   |     |                   | 54             |
| <i>Pap1160</i>  | -----                                                                                                                   |     |                   | 47             |
| <i>Pach</i>     | -----                                                                                                                   | C   |                   | 53             |
| <i>Ptxe350</i>  | -----                                                                                                                   |     |                   | 48             |
| <i>Ptxe6864</i> | -----                                                                                                                   |     |                   | 54             |
| 8678            | -----                                                                                                                   |     |                   | 38             |
| 8632            | -----                                                                                                                   |     |                   | 37             |
| 8680            | -----                                                                                                                   |     |                   | 38             |
| <i>Asnu586</i>  | -----                                                                                                                   |     |                   | 36             |
| <i>Haro486</i>  | -----                                                                                                                   |     |                   | 51             |
| <i>Enni</i>     | -----                                                                                                                   |     |                   | 50             |
| <i>Enni309</i>  | -----                                                                                                                   |     |                   | 51             |
| <i>Ptsa</i>     | -----                                                                                                                   |     |                   | 48             |
| <i>Asnu</i>     | -----                                                                                                                   |     |                   | 36             |





| Sequence        | 481                                                                                                                     | 600 | Haplogroup | Localit |
|-----------------|-------------------------------------------------------------------------------------------------------------------------|-----|------------|---------|
| <u>Y</u>        |                                                                                                                         |     |            |         |
| 1514            | ACCCACCATGCCGGGCGTTCTTT*CCAGCGTGTGGGGGGTTCTCTTTTTTTTTNN**CCTTTCATTGACATCTCAGAGTGCACACAGAAATGACAGACAAGGTTGAACATTTTCCTCGC |     | VA         | 17      |
| 1605            | -----T-----T-----                                                                                                       |     |            | 16      |
| 9019            | -----N-----T-----                                                                                                       |     | VB         | 45      |
| 8880            | -----T-----T-----                                                                                                       |     |            | 39      |
| 8722            | -----TT-----T-----                                                                                                      |     |            | 40      |
| 8773            | -----TT-----T-----                                                                                                      |     |            | 39      |
| 8777            | -----TTT-----T-----                                                                                                     |     |            | 39      |
| 8881            | -----T-----T-----                                                                                                       |     |            | 39      |
| 8834            | -----T-----T-----                                                                                                       |     |            | 44      |
| 8768            | -----T-----T-----                                                                                                       |     |            | 39      |
| 8786            | -----T-----T-----                                                                                                       |     |            | 44      |
| 8837            | -----T-----T-----                                                                                                       |     |            | 44      |
| 8778            | -----*-----T-----                                                                                                       |     |            | 39      |
| 8711            | -----T-----T-----                                                                                                       |     |            | 40      |
| 8718            | -----T-----T-----                                                                                                       |     |            | 40      |
| 8833            | -----A-----T-----                                                                                                       |     |            | 44      |
| 8831            | -----T-N-----T-----                                                                                                     |     |            | 44      |
| 8879            | -----TT-----T-----                                                                                                      |     |            | 39      |
| 8741            | -----TT-----T-----                                                                                                      |     |            | 40      |
| 9049            | -----T-----T-----                                                                                                       |     |            | 46      |
| 8801            | -----TT-----T-----                                                                                                      |     |            | 44      |
| 8990            | -----T-----T-----                                                                                                       |     |            | 45      |
| 8924            | -----TT-----T-----                                                                                                      |     |            | 43      |
| 9003            | -----T-N-----T-----                                                                                                     |     |            | 45      |
| 8687            | -----*-----T-----                                                                                                       |     |            | 41      |
| 8692            | -----*-----TTT-----T-----                                                                                               |     |            | 41      |
| 8694            | -----*-----T-----T-----                                                                                                 |     |            | 41      |
| 8948            | -----TC-----T-----                                                                                                      |     |            | 42      |
| 8947            | -----TC-----T-----                                                                                                      |     |            | 42      |
| 8950            | -----T-----T-----                                                                                                       |     |            | 42      |
| <i>Enci</i>     | -----TT-----T-----                                                                                                      |     | VC         | 48      |
| <i>Asve616</i>  | -----TT-----T-----                                                                                                      |     |            | 36      |
| <i>Prve687</i>  | -----*-----TCT-----T-----                                                                                               |     |            | 36      |
| <i>Prve691</i>  | -----*-----CT-----T-----                                                                                                |     |            | 36      |
| <i>Pach5722</i> | -----TT-----T-----                                                                                                      |     |            | 54      |
| <i>Pap1160</i>  | -----T*-----T-----                                                                                                      |     |            | 47      |
| <i>Pach</i>     | -----T-----T-----A-----                                                                                                 |     |            | 53      |
| <i>Ptxe350</i>  | -----TC-----T-----                                                                                                      |     |            | 48      |
| <i>Ptxe6864</i> | -----A-----NCC-----T-----                                                                                               |     |            | 54      |
| 8678            | -----NCC-----*-----T-----                                                                                               |     |            | 38      |
| 8632            | -----TT-----T-----                                                                                                      |     |            | 37      |
| 8680            | -----T-----T-----                                                                                                       |     |            | 38      |
| <i>Asnu586</i>  | -----T-----T-----                                                                                                       |     |            | 36      |
| <i>Haro486</i>  | -----T-----T-----                                                                                                       |     |            | 51      |
| <i>Enni</i>     | -----TT-----T-----                                                                                                      |     |            | 50      |
| <i>Enni309</i>  | -----TT-----T-----                                                                                                      |     |            | 51      |
| <i>Ptsa</i>     | -----TT-----T-----                                                                                                      |     |            | 48      |
| <i>Asnu</i>     | -----TT-----T-----                                                                                                      |     |            | 36      |

|                 |       |     |       |      |       |     |         |
|-----------------|-------|-----|-------|------|-------|-----|---------|
| <i>Prveb121</i> | ----- | TTN | ----- | T    | ----- |     | 48      |
| <i>Asve619</i>  | ----- | T*  | ----- | T    | ----- |     | 36      |
| <i>Lime</i>     | ----- | T   | ----- | T    | ----- |     | 51      |
| <i>Asve605</i>  | ----- | T   | ----- | T    | ----- |     | 36      |
| <i>Enni817</i>  | ----- | T   | ----- | T    | ----- |     | 48      |
| <i>Ptxe6865</i> | ----- | T   | ----- | T    | ----- |     | 54      |
| <i>Ptxe326</i>  | ----- | T   | ----- | T    | ----- |     | 48      |
| <i>Pap1201</i>  | ----- | T*  | ----- | T    | ----- |     | 47      |
| <i>Ptsa320</i>  | ----- |     | ----- | T    | ----- |     | 48      |
| <i>Asve663</i>  | ----- |     | ----- | T    | ----- |     | 36      |
| <i>HOU12552</i> | ----- | C   | ----- | T    | ----- |     |         |
| <i>6701</i>     | ----- | N   | ----- |      | ----- |     | 2       |
| <i>Pap1</i>     | ----- | TT  | ----- | T    | ----- |     | 48      |
| <i>Psri</i>     | ----- | TT  | ----- | T    | ----- |     | 48      |
| <i>Pap173</i>   | ----- | T   | ----- | T    | ----- |     | 48      |
| <i>Pach5721</i> | ----- | T   | ----- | T    | ----- |     | 54      |
| <i>Ysla179</i>  | ----- |     | ----- | T    | ----- |     | 48      |
| <i>Ysla335</i>  | ----- | *   | ----- | T    | ----- |     | 48      |
| <i>Ysla6937</i> | ----- | T   | ----- | T    | ----- |     | 53      |
| <i>6745</i>     | ----- | A   | ----- | T    | ----- | A   | VD 52   |
| <i>1006</i>     | ----- | *   | ----- | TTT  | ----- | T   | I 29    |
| <i>1590</i>     | ----- | *   | ----- | CT*  | ----- | T   | 29      |
| <i>1011</i>     | ----- | *   | ----- | TTN  | ----- | T   | 29      |
| <i>1531</i>     | ----- | *   | ----- | TTN  | ----- | T   | 29      |
| <i>1591</i>     | ----- | *   | ----- | T-N  | ----- | T   | 29      |
| <i>1510</i>     | ----- | *   | ----- | TTN  | ----- | T   | 29      |
| <i>1076</i>     | ----- |     | ----- | T    | ----- | T   | III 7   |
| <i>1501</i>     | ----- |     | ----- | T-N  | ----- | T   | 7       |
| <i>8903</i>     | ----- |     | ----- | T    | ----- |     | VII 43  |
| <i>8911</i>     | ----- |     | ----- | TT   | ----- |     | 43      |
| <i>8785</i>     | ----- |     | ----- | T    | ----- |     | 44      |
| <i>8746</i>     | ----- |     | ----- | T*   | ----- | T   | 40      |
| <i>1533</i>     | ----- |     | ----- | T    | ----- | T   | 27      |
| <i>1609</i>     | ----- |     | ----- | TTN  | ----- | T   | 9       |
| <i>1601</i>     | ----- |     | ----- | T*   | ----- | T   | 27      |
| <i>1738</i>     | ----- | *   | ----- | TTN  | ----- | T   | A VI 5  |
| <i>6249</i>     | ----- | *   | ----- | TTTN | ----- | T   | A 4     |
| <i>1530</i>     | ----- | *   | ----- | TTT  | ----- | T   | 6       |
| <i>1537</i>     | ----- | *   | ----- | CT   | ----- | T   | 3       |
| <i>1597</i>     | ----- | A   | ----- | TT-N | ----- | T   | II 13   |
| <i>1546</i>     | ----- | A   | ----- | T    | ----- | T   | 14      |
| <i>1598</i>     | ----- | A   | ----- | A    | ----- | *   | T 14    |
| <i>1547</i>     | ----- | A   | ----- | A    | ----- | TT  | T 14    |
| <i>1636</i>     | ----- | A   | ----- | *    | ----- | TT  | T IV 17 |
| <i>1635</i>     | ----- | A   | ----- | *    | ----- | TTT | T 17    |
| <i>1515</i>     | ----- | A   | ----- | *    | ----- | TT  | T 17    |



| Sequence        | 601                                                                                                                     | 720 | Haplogroup | Localit |
|-----------------|-------------------------------------------------------------------------------------------------------------------------|-----|------------|---------|
| <u>Y</u>        |                                                                                                                         |     |            |         |
| 1514            | TTAAAAGAAATAGTATGAATGGTGATAAGATATTAATAGAAGAATTGCATAACTGATATCATGAGCATAAAGTTTAATCAGAT*ATTTAATTTT*CCCCAAACTTCCTATTATCACCCC |     | VA         | 17      |
| 1605            | -----                                                                                                                   |     |            | 16      |
| 9019            | -----                                                                                                                   |     | VB         | 45      |
| 8880            | -----                                                                                                                   |     |            | 39      |
| 8722            | -----C-----                                                                                                             |     |            | 40      |
| 8773            | -----                                                                                                                   |     |            | 39      |
| 8777            | -----T-----                                                                                                             |     |            | 39      |
| 8881            | -----                                                                                                                   |     |            | 39      |
| 8834            | -----                                                                                                                   |     |            | 44      |
| 8768            | -----                                                                                                                   |     |            | 39      |
| 8786            | -----                                                                                                                   |     |            | 44      |
| 8837            | -----                                                                                                                   |     |            | 44      |
| 8778            | -----                                                                                                                   |     |            | 39      |
| 8711            | -----                                                                                                                   |     |            | 40      |
| 8718            | -----                                                                                                                   |     |            | 40      |
| 8833            | -----G-----                                                                                                             |     |            | 44      |
| 8831            | -----G-----                                                                                                             |     |            | 44      |
| 8879            | -----G-----                                                                                                             |     |            | 39      |
| 8741            | -----G-----                                                                                                             |     |            | 40      |
| 9049            | -----G-----                                                                                                             |     |            | 46      |
| 8801            | -----G-----                                                                                                             |     |            | 44      |
| 8990            | -----G-----                                                                                                             |     |            | 45      |
| 8924            | -----                                                                                                                   |     |            | 43      |
| 9003            | -----                                                                                                                   |     |            | 45      |
| 8687            | -----C-----                                                                                                             |     |            | 41      |
| 8692            | -----C-----                                                                                                             |     |            | 41      |
| 8694            | -----C-----                                                                                                             |     |            | 41      |
| 8948            | -----                                                                                                                   |     |            | 42      |
| 8947            | -----G-----                                                                                                             |     |            | 42      |
| 8950            | -----G-----                                                                                                             |     |            | 42      |
| <i>Enci</i>     | -----G-----                                                                                                             |     | VC         | 48      |
| <i>Asve616</i>  | -----G-----                                                                                                             |     |            | 36      |
| <i>Prve687</i>  | -----G-----                                                                                                             |     |            | 36      |
| <i>Prve691</i>  | -----G-----                                                                                                             |     |            | 36      |
| <i>Pach5722</i> | -----G-C-----                                                                                                           |     |            | 54      |
| <i>Pap1160</i>  | C-----G-----                                                                                                            |     |            | 47      |
| <i>Pach</i>     | -----G-----A-----                                                                                                       |     |            | 53      |
| <i>Ptxe350</i>  | -----G-----A-----                                                                                                       |     |            | 48      |
| <i>Ptxe6864</i> | -----G-----                                                                                                             |     |            | 54      |
| 8678            | -----                                                                                                                   |     |            | 38      |
| 8632            | -----GG-----                                                                                                            |     |            | 37      |
| 8680            | -----GG-----                                                                                                            |     |            | 38      |
| <i>Asnu586</i>  | -----                                                                                                                   |     |            | 36      |
| <i>Haro486</i>  | -----G-----                                                                                                             |     |            | 51      |
| <i>Enni</i>     | -----G-----                                                                                                             |     |            | 50      |
| <i>Enni309</i>  | -----G-----                                                                                                             |     |            | 51      |
| <i>Ptsa</i>     | -----C-----                                                                                                             |     |            | 48      |
| <i>Asnu</i>     | -----G-----                                                                                                             |     |            | 36      |







Sequence 721

845 Haplogroup Localit

| Y        | Sequence                                                                                                                  | Haplogroup | Localit |
|----------|---------------------------------------------------------------------------------------------------------------------------|------------|---------|
| 1514     | C*GGTTTCTGCGCGTAAACCCCCCTACCCCTCC*AACTCCTAAGATCTCTAAGACTCCTGCAAACCCCGGAAACAGGAAAAGCTCTAGAAGTG*TTTTTCACACTCGT*AATGTACAGACA | VA         | 17      |
| 1605     | -----A-----                                                                                                               |            | 16      |
| 9019     | -----                                                                                                                     | VB         | 45      |
| 8880     | -----                                                                                                                     |            | 39      |
| 8722     | -----                                                                                                                     |            | 40      |
| 8773     | -----G-----                                                                                                               |            | 39      |
| 8777     | -----G-----                                                                                                               |            | 39      |
| 8881     | -----                                                                                                                     |            | 39      |
| 8834     | -----                                                                                                                     |            | 44      |
| 8768     | -----                                                                                                                     |            | 39      |
| 8786     | -----                                                                                                                     |            | 44      |
| 8837     | -----                                                                                                                     |            | 44      |
| 8778     | -----                                                                                                                     |            | 39      |
| 8711     | -----                                                                                                                     |            | 40      |
| 8718     | -----                                                                                                                     |            | 40      |
| 8833     | -----                                                                                                                     |            | 44      |
| 8831     | -----A-----                                                                                                               |            | 44      |
| 8879     | -----                                                                                                                     |            | 39      |
| 8741     | -----                                                                                                                     |            | 40      |
| 9049     | -----                                                                                                                     |            | 46      |
| 8801     | -----                                                                                                                     |            | 44      |
| 8990     | -----                                                                                                                     |            | 45      |
| 8924     | -----                                                                                                                     |            | 43      |
| 9003     | -----G-----                                                                                                               |            | 45      |
| 8687     | -----                                                                                                                     |            | 41      |
| 8692     | -----                                                                                                                     |            | 41      |
| 8694     | -----                                                                                                                     |            | 41      |
| 8948     | -----A-----T                                                                                                              |            | 42      |
| 8947     | -----T-----                                                                                                               |            | 42      |
| 8950     | -----T-----                                                                                                               |            | 42      |
| Enci     | -----                                                                                                                     | VC         | 48      |
| Asve616  | -----                                                                                                                     |            | 36      |
| Prve687  | -----T-----                                                                                                               |            | 36      |
| Prve691  | -----T-----                                                                                                               |            | 36      |
| Pach5722 | -----                                                                                                                     |            | 54      |
| Pap1160  | -----                                                                                                                     |            | 47      |
| Pach     | -----                                                                                                                     |            | 53      |
| Ptxe350  | -----                                                                                                                     |            | 48      |
| Ptxe6864 | -----                                                                                                                     |            | 54      |
| 8678     | -----A-----                                                                                                               |            | 38      |
| 8632     | -----                                                                                                                     |            | 37      |
| 8680     | -----A-----                                                                                                               |            | 38      |
| Asnu586  | -----                                                                                                                     |            | 36      |
| Harc486  | -----T-----                                                                                                               |            | 51      |
| Enni     | -----                                                                                                                     |            | 50      |
| Enni309  | -----                                                                                                                     |            | 51      |
| Ptsa     | -----                                                                                                                     |            | 48      |
| Asnu     | -----                                                                                                                     |            | 36      |

|          |       |   |    |  |  |   |  |   |   |     |    |
|----------|-------|---|----|--|--|---|--|---|---|-----|----|
| Prveb121 | ----- |   |    |  |  |   |  |   |   |     | 48 |
| Asve619  | ----- |   |    |  |  |   |  |   |   |     | 36 |
| Lime     | ----- |   |    |  |  |   |  |   |   |     | 51 |
| Asve605  | ----- |   |    |  |  |   |  |   |   |     | 36 |
| Enni817  | ----- |   |    |  |  |   |  |   |   |     | 48 |
| Ptxe6865 | ----- |   |    |  |  |   |  |   |   |     | 54 |
| Ptxe326  | ----- |   |    |  |  |   |  |   |   |     | 48 |
| Pap1201  | ----- |   |    |  |  |   |  |   |   |     | 47 |
| Ptsa320  | ----- |   |    |  |  |   |  |   |   |     | 48 |
| Asve663  | ----- |   |    |  |  |   |  |   |   |     | 36 |
| HOU12552 | ----- |   |    |  |  |   |  |   |   |     |    |
| 6701     | ----- |   |    |  |  |   |  |   |   |     | 2  |
| Pap1     | ----- |   |    |  |  |   |  |   |   |     | 48 |
| Psri     | ----- |   |    |  |  |   |  |   |   |     | 48 |
| Pap173   | ----- |   |    |  |  |   |  |   |   |     | 48 |
| Pach5721 | ----- |   |    |  |  |   |  |   |   |     | 54 |
| Ysla179  | ----- |   |    |  |  |   |  |   |   |     | 48 |
| Ysla335  | ----- |   |    |  |  |   |  |   |   |     | 48 |
| Ysla6937 | ----- |   |    |  |  |   |  |   |   |     | 53 |
| 6745     | ----- |   |    |  |  |   |  |   |   | VD  | 52 |
| 1006     | ----- | G | -G |  |  |   |  | G | T | I   | 29 |
| 1590     | ----- | G |    |  |  |   |  | G | T |     | 29 |
| 1011     | ----- | G |    |  |  |   |  | G | T |     | 29 |
| 1531     | ----- | G |    |  |  |   |  | G | T |     | 29 |
| 1591     | ----- | G |    |  |  | * |  | G | T |     | 29 |
| 1510     | ----- | G |    |  |  |   |  | G | T |     | 29 |
| 1076     | ----- |   |    |  |  |   |  | G | T | III | 7  |
| 1501     | ----- |   |    |  |  |   |  | G | T |     | 7  |
| 8903     | ----- |   |    |  |  |   |  | G | T | VII | 43 |
| 8911     | ----- |   | A  |  |  |   |  | G | T |     | 43 |
| 8785     | ----- |   |    |  |  |   |  | G | T |     | 44 |
| 8746     | ----- | G |    |  |  |   |  | G | T |     | 40 |
| 1533     | ----- |   |    |  |  |   |  | G | T |     | 27 |
| 1609     | ----- |   |    |  |  |   |  | * | T |     | 9  |
| 1601     | ----- |   |    |  |  |   |  | G | T |     | 27 |
| 1738     | ----- | T |    |  |  |   |  | G |   | VI  | 5  |
| 6249     | ----- | T |    |  |  |   |  | G |   |     | 4  |
| 1530     | ----- | T |    |  |  |   |  | G |   |     | 6  |
| 1537     | ----- |   |    |  |  |   |  | G |   |     | 3  |
| 1597     | ----- |   | A  |  |  |   |  | G |   | II  | 13 |
| 1546     | ----- |   |    |  |  |   |  | G |   |     | 14 |
| 1598     | ----- |   | A  |  |  |   |  | G |   |     | 14 |
| 1547     | ----- |   |    |  |  |   |  | G |   |     | 14 |
| 1636     | ----- |   |    |  |  |   |  | * | T | IV  | 17 |
| 1635     | ----- |   | A  |  |  |   |  | * | T |     | 17 |
| 1515     | ----- |   |    |  |  |   |  | * | T |     | 17 |

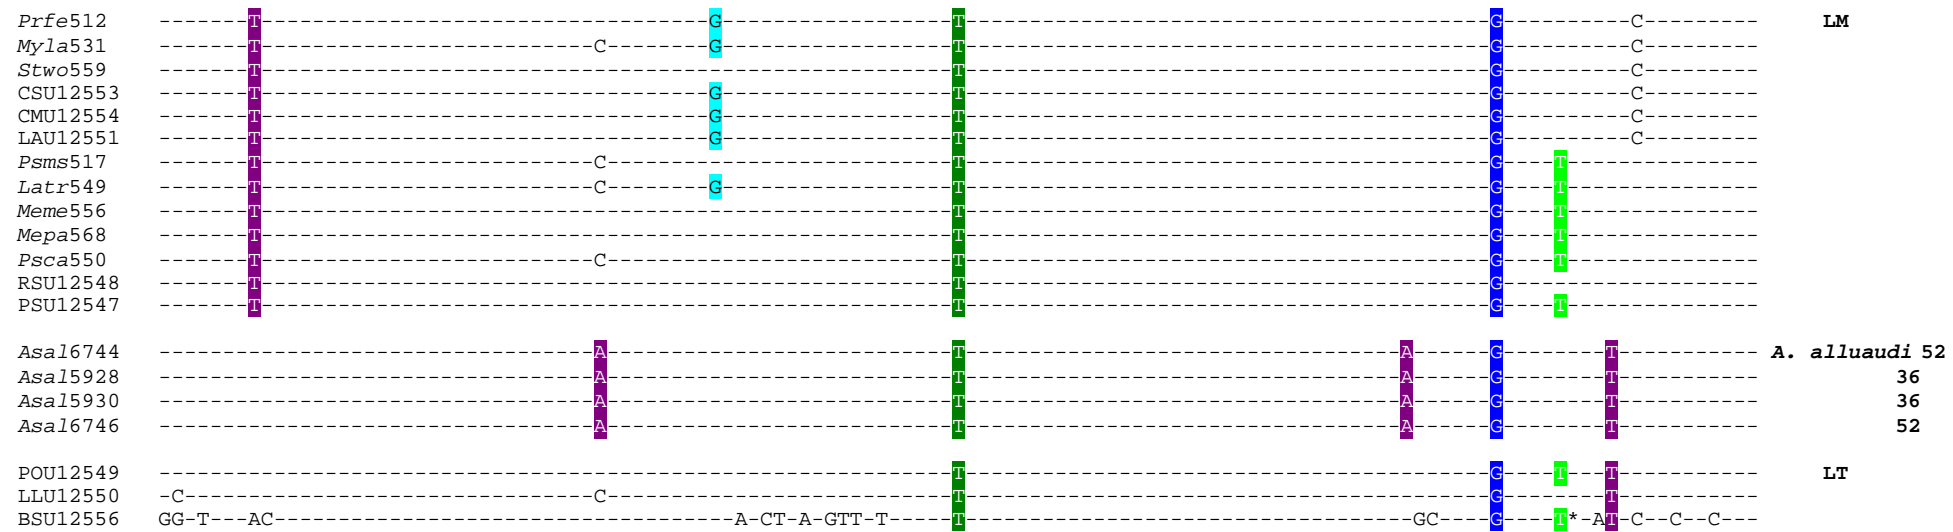

Supplement: 10874756s01.pdf [file 10874756s01.pdf]
